# Supplementary material
Source: PubMed Central journal article supplement (PMC5338604)
Supplement: NIHMS850862-supplement-supplement_1.pdf [file NIHMS850862-supplement-supplement_1.pdf]

**Cell Systems, Volume 4**

**Supplemental Information**

**Systems Genetics Approach Identifies Gene Pathways  
and Adamts2 as Drivers of Isoproterenol-Induced  
Cardiac Hypertrophy and Cardiomyopathy in Mice**

**Christoph D. Rau, Milagros C. Romay, Mary Tuteryan, Jessica J.-C. Wang, Marc Santolini, Shuxun Ren, Alain Karma, James N. Weiss, Yibin Wang, and Aldons J. Lusic**

**Data S1:** Edge strengths and Module Memberships for the Control, Treated and Ratio networks. Related to STAR Methods wMICA section.

Available on Mendeley Data doi: 10.17632/ntd85jnwxd.1

**Table S1:** Top Gene Ontology Enrichments in Modules of the left ventricular Gene Coexpression Network. Related to Figure 1A

| Module | GO Term                       | DAVID Score |
|--------|-------------------------------|-------------|
| 1      | Cell Morphology               | 2.18        |
| 2      | Protein Transport             | 4.01        |
| 3      | Intracellular Organelle Lumen | 10.88       |
| 4      | Innate Immune Response        | 10.51       |
| 5      | Signaling                     | 17.81       |
| 6      | RNA binding                   | 2.75        |
| 7      | Translation                   | 2.64        |
| 8      | Zinc Binding                  | 5.00        |
| 9      | Tissue Morphogenesis          | 4.17        |
| 10     | Oxidative Phosphorylation     | 2.22        |
| 11     | Sarcomere                     | 1.99        |
| 12     | Mitochondrion                 | 5.48        |
| 13     | Transcription                 | 1.95        |
| 14     | Transit Peptide               | 8.04        |
| 15     | Cytochrome P450               | 9.51        |
| 16     | Immune Response               | 5.4         |
| 17     | Lung Development              | 3.25        |
| 18     | Zinc Binding                  | 2.14        |
| 19     | Contractile Fiber             | 2.09        |
| 20     | Cytoskeleton                  | 3.07        |

**Table S2:** Drivers and reactive genes in module 5. Related to Figure 2C

| Probe ID     | Gene Symbol   | Forward | Reverse | % Forward | Category     |
|--------------|---------------|---------|---------|-----------|--------------|
| ILMN_1216661 | COL6A2        | 19      | 0       | 100       | Driver       |
| ILMN_2698499 | NOX4          | 1       | 0       | 100       | Driver       |
| ILMN_1226259 | ADAMTS2       | 23      | 2       | 92        | Driver       |
| ILMN_2729103 | ADAMTS2       | 24      | 3       | 89        | Driver       |
| ILMN_1238000 | SRPX          | 7       | 1       | 88        | Driver       |
| ILMN_2671755 | CERCAM        | 22      | 4       | 84        | Driver       |
| ILMN_1253741 | PCOLCE        | 16      | 3       | 84        | Driver       |
| ILMN_1256676 | DDAH1         | 5       | 1       | 83        | Driver       |
| ILMN_2728985 | FBLN1         | 13      | 4       | 76        | Driver       |
| ILMN_1217009 | RAB15         | 9       | 3       | 75        | Driver       |
| ILMN_1249000 | 1500015O10RIK | 6       | 2       | 75        | Driver       |
| ILMN_1253791 | KCNV2         | 2       | 1       | 67        | Intermediary |
| ILMN_2981542 | MFAP2         | 7       | 4       | 64        | Intermediary |
| ILMN_2701778 | ITGA11        | 3       | 2       | 60        | Intermediary |
| ILMN_2591027 | COL14A1       | 8       | 6       | 57        | Intermediary |
| ILMN_2903926 | PDGFRL        | 4       | 3       | 57        | Intermediary |
| ILMN_2636424 | ITGBL1        | 1       | 1       | 50        | Intermediary |
| ILMN_2862538 | COL12A1       | 2       | 2       | 50        | Intermediary |
| ILMN_2926480 | DIRAS2        | 5       | 5       | 50        | Intermediary |
| ILMN_3128725 | EGFR          | 2       | 2       | 50        | Intermediary |
| ILMN_2463181 | TNC           | 7       | 8       | 47        | Intermediary |
| ILMN_2463180 | TNC           | 6       | 8       | 43        | Intermediary |
| ILMN_3161547 | NPPA          | 2       | 3       | 40        | Intermediary |
| ILMN_1234824 | CCDC80        | 5       | 8       | 38        | Intermediary |
| ILMN_1231851 | ENPP1         | 5       | 9       | 36        | Intermediary |
| ILMN_2627041 | CX3CL1        | 1       | 2       | 33        | Intermediary |
| ILMN_2627566 | CAPN5         | 2       | 4       | 33        | Intermediary |
| ILMN_2638114 | PTN           | 2       | 4       | 33        | Intermediary |
| ILMN_1259653 | GNG8          | 3       | 6       | 33        | Intermediary |
| ILMN_2675697 | KDELR3        | 3       | 6       | 33        | Intermediary |
| ILMN_2698728 | SRPX2         | 5       | 10      | 33        | Intermediary |
| ILMN_2818294 | SRPX2         | 4       | 12      | 25        | Reactive     |

|              |        |   |    |    |          |
|--------------|--------|---|----|----|----------|
| ILMN_2886618 | NBL1   | 1 | 5  | 17 | Reactive |
| ILMN_1233455 | OLFML3 | 1 | 13 | 7  | Reactive |
| ILMN_2852957 | DKK3   | 0 | 1  | 0  | Reactive |
| ILMN_2746556 | DKK3   | 0 | 2  | 0  | Reactive |
| ILMN_2904765 | SNAI1  | 0 | 3  | 0  | Reactive |
| ILMN_2706268 | SCARA3 | 0 | 6  | 0  | Reactive |
| ILMN_2869110 | COMP   | 0 | 9  | 0  | Reactive |
| ILMN_1225835 | MFAP5  | 0 | 13 | 0  | Reactive |
| ILMN_3103896 | TIMP1  | 0 | 15 | 0  | Reactive |
| ILMN_2691951 | SVEP1  | 0 | 16 | 0  | Reactive |
| ILMN_2769918 | TIMP1  | 0 | 18 | 0  | Reactive |

**Table S3:** Characteristics of Module 5 *Adamts2* target genes that were selected for *in vitro* validation using siRNA knockdown in NRVMs. Related to Figure 3

| Gene Symbol    | Probe ID     | Predicted Strength of relationship to <i>Adamts2</i> by NEO | Number of Predicted Edges in Module 5 | Previous Association with cardiovascular disease                                                                                                      |
|----------------|--------------|-------------------------------------------------------------|---------------------------------------|-------------------------------------------------------------------------------------------------------------------------------------------------------|
| <i>Col12a1</i> | ILMN_2862538 | 0.52919                                                     | 4                                     | Recessive and dominant mutations in COL12A1 cause a novel EDS/myopathy overlap syndrome in humans and mice                                            |
| <i>Kcnv2</i>   | ILMN_1253791 | 0.55139                                                     | 3                                     |                                                                                                                                                       |
| <i>Mfap2</i>   | ILMN_2981542 | 0.54725                                                     | 13                                    |                                                                                                                                                       |
| <i>Nppa</i>    | ILMN_3161547 | 0.5395                                                      | 5                                     | Hypertrophic marker                                                                                                                                   |
| <i>Pcolce</i>  | ILMN_1253741 | 0.75863<br>0.77621                                          | 19                                    | Candidate gene for RV weight (Rau 2015)                                                                                                               |
| <i>Timp1</i>   | ILMN_3103896 | 0.72486<br>0.69964                                          | 15                                    | ECM regulator that is increased during heart failure (Barton 2003)                                                                                    |
|                | ILMN_2769918 | 0.73708<br>0.71147                                          | 18                                    |                                                                                                                                                       |
| <i>Tnc</i>     | ILMN_2463181 | N/A                                                         | 15                                    | Expression of TNC has been suggested to accelerate adverse ventricular remodeling, cardiac failure, and fibrosis in the residual myocardium after MI. |
|                | ILMN_2463180 | 0.62397<br>0.6225                                           | 14                                    |                                                                                                                                                       |

**Table S4:** Sequence-level Analysis of Driver Genes of Module 5. Related to STAR Methods eQTL Analysis Section

| <b>Gene</b>   | <b>Sequence Variation</b> | <b>Which Strains</b> | <b>Result</b>                   | <b>eQTLs</b>                 |
|---------------|---------------------------|----------------------|---------------------------------|------------------------------|
| Pcolce        | 2 missense                | Non-core             | Tolerated                       | Significant <i>cis</i> -eQTL |
| Rab15         | 1 missense                | Non-core             | Tolerated                       | Significant <i>cis</i> -eQTL |
| Adamts2       | 1 missense                | Non-core             | Tolerated                       | Significant <i>cis</i> -eQTL |
|               | 1 splice site             | Core                 | Not predicted to cause splicing |                              |
| Srxp          | 1 missense                | Core                 | Tolerated                       | Suggestive <i>cis</i> -eQTL  |
|               | 1 splice                  | Core                 | Not predicted to cause splicing |                              |
| Nox4          | 1 missense                | Core                 | Tolerated                       | Suggestive <i>cis</i> -eQTL  |
|               | 1 splice                  | Core                 | Not predicted to cause splicing |                              |
| 1500015O10Rik | 1 missense                | Core                 | Wild Type Allele Damaging       | Significant <i>cis</i> -eQTL |
| Kcnv2         | 1 missense                | Non-core             | Mutant Allele Damaging          | Significant <i>cis</i> -eQTL |
|               | 1 missense                | Core                 | Tolerated                       |                              |

**Table S5:** qRT - PCR primers used in NRVM experiments. Related to STAR Methods qPCR Section

| <b>Gene</b>      | <b>Foward</b>         | <b>Reverse</b>          |
|------------------|-----------------------|-------------------------|
| Rpl0             | GGCGTCCTCATTAGAGTGACA | GCATCATGGTGTCTTGCCC     |
| Nppa             | GCAAACATCAGATCGTGCCC  | GGTGGTCTAGCAGGTTCTTGAAA |
| Nppb             | GTGCTGCCCCAGATGATTCT  | GGCGCTGTCTTGAGACCTAA    |
| Adamts2          | GGTGTCCCACGTGGTATCTT  | CGGCCGAATACTGTGAGGTT    |
| Atp2a2 Isoform A | TCACACCGCTGAATCTGACC  | GCACAAAGGGCCAGGAAATG    |
| Atp2a2 Isoform B | GAGACGCTCAAGTTTGTGGC  | GGGCTGGAAGATGTGTTGCT    |
| Col12a           | CTATCCAGAGCCTTATGTGCC | AGCACTTGTGGATGAAGCGA    |
| Kcnv2            | AGCGCTGGAAGACCTCTCTA  | AGATGGGGCAGTCATACCCT    |
| Mfap2            | GCGACCAGATAGAGAACGCA  | GGGTACTGTTCTTCACGGCA    |
| Pcolce           | GGCACTGAGCACCAGTTTTG  | AATCCGACTCAGGCCAGTTG    |
| Timp1            | ACGCTAGAGCAGATAACCAG  | AGCGTCGAATCCTTTGAGCA    |
| Tnc              | CAGCTACCGACGGGATCTTC  | TTCCGGTTCAGCTTCTGTGG    |

**Table S6:** Mouse strains used in this study. Related to STAR Methods Animals section

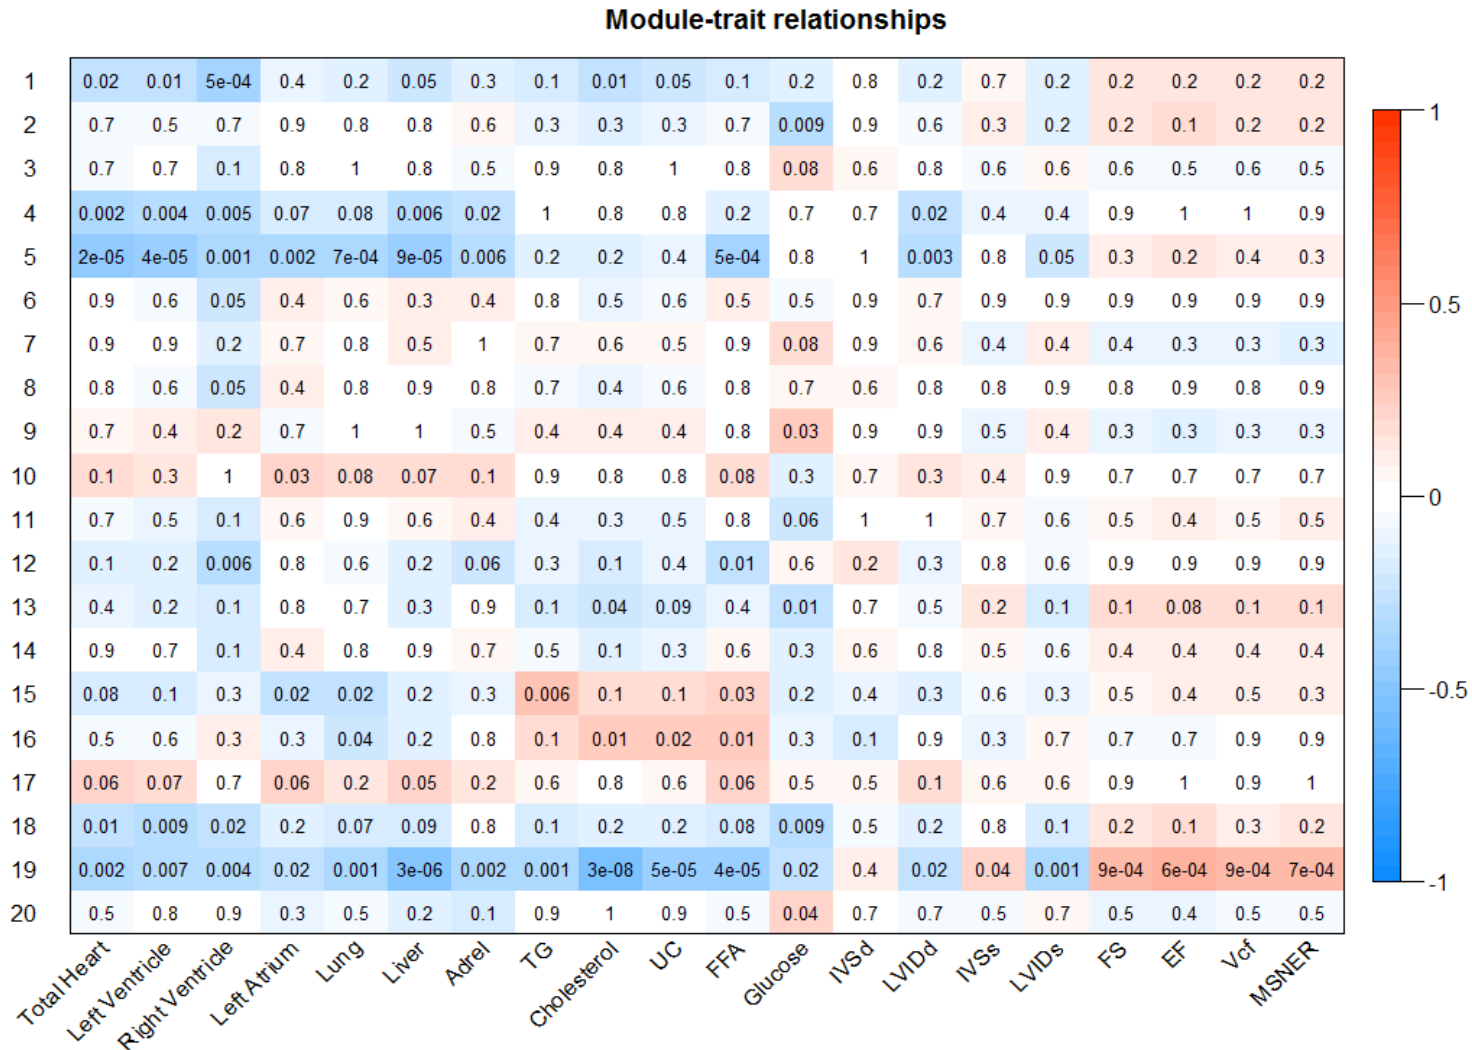

**Figure S1. Module-Trait Correlation for Treated Network, Related to Figure 1B.** A weighted PCA algorithm was used to calculate the first weighted principle component of each module. These weighted first principle components were then correlated to the HF-related phenotypes. Strength of correlation is indicated by color, while the p-value of the correlation is indicated by the numbers in the table.



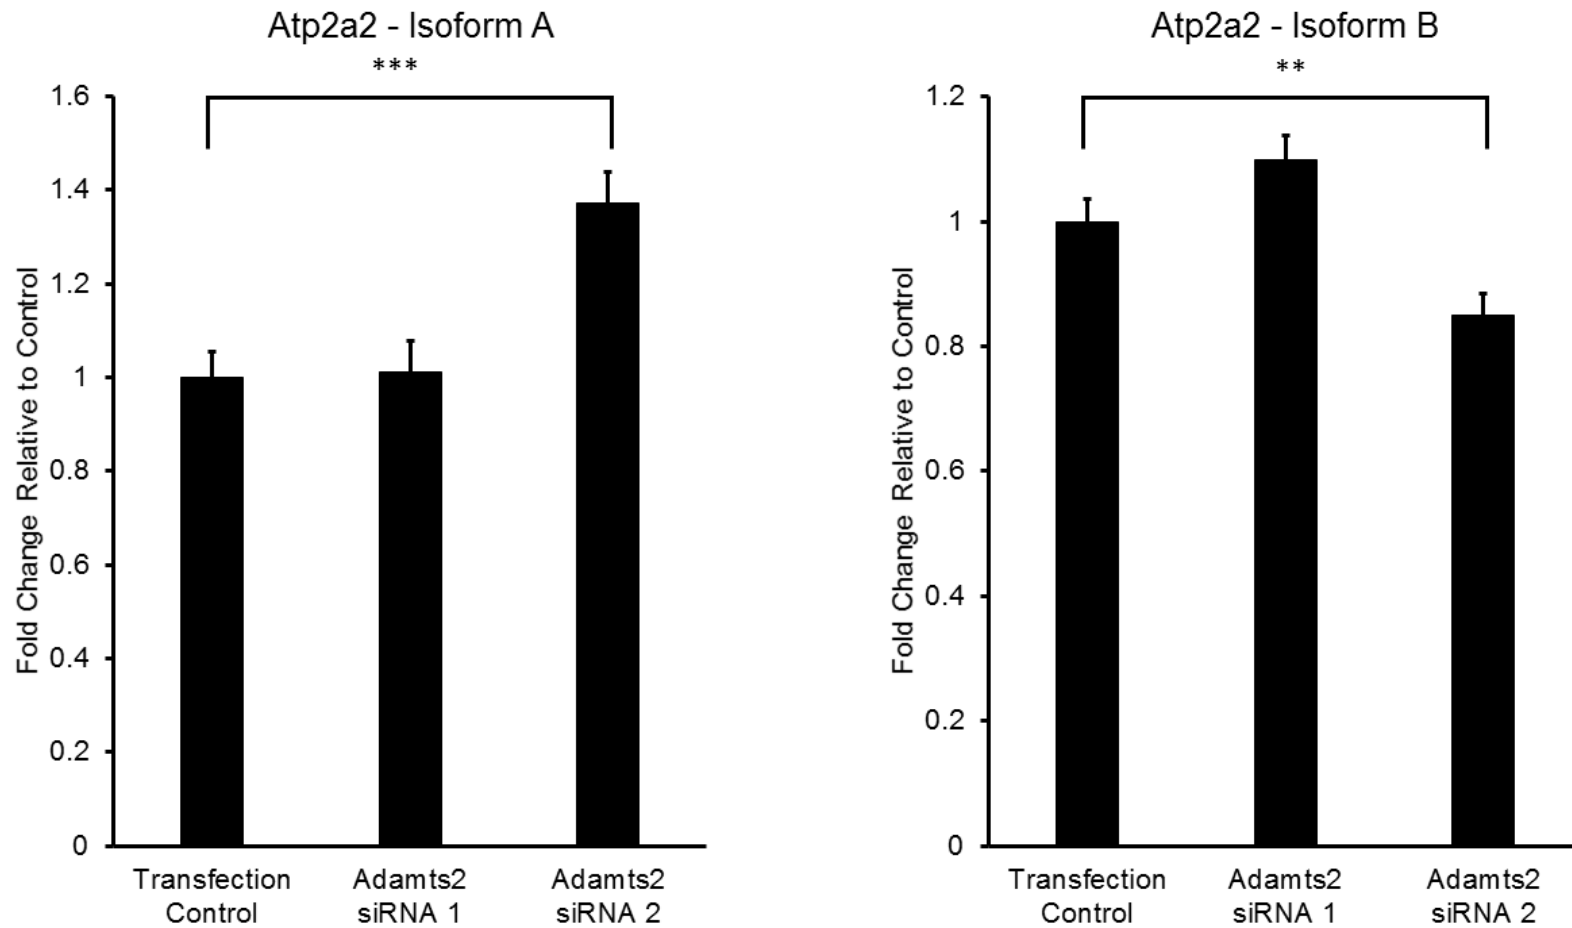

**Figure S2. Expression of *Atp2a2* is not altered by *Adamts2* knockdown, related to Figure 3.** NRVMs were transfected with either control siRNA or *Adamts2* siRNA. Following overnight transfection NRVMs were treated with isoproterenol (60 $\mu$ M) containing media for 48 hours. mRNA levels were quantified using RT-qPCR. Plots show average  $\pm$  SEM. N = 8-9
